# Supplementary material
Source: PubMed Central journal article supplement (PMC6533092)
Supplement: Appendix.pdf [file Appendix.pdf]

# Supplementary Material, Sling exercises

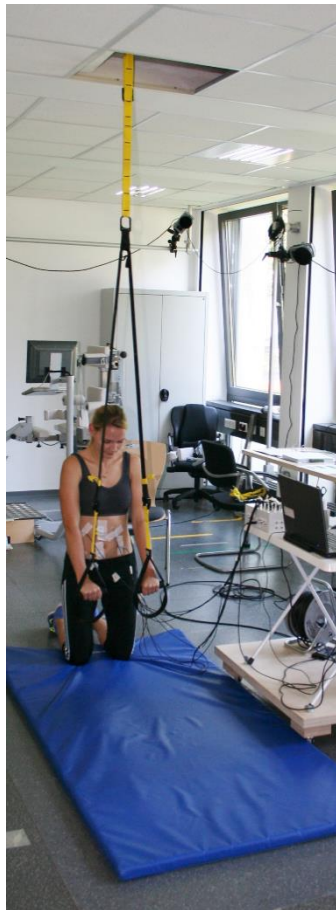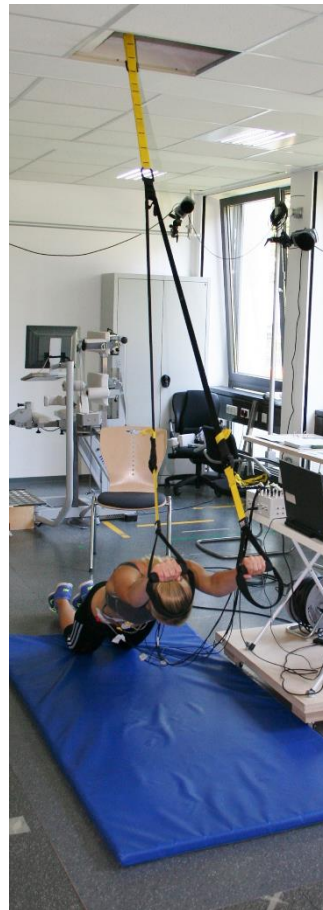

*Figure SM1.* The sling exercise „Body extension“. Left: starting position; right: end position.

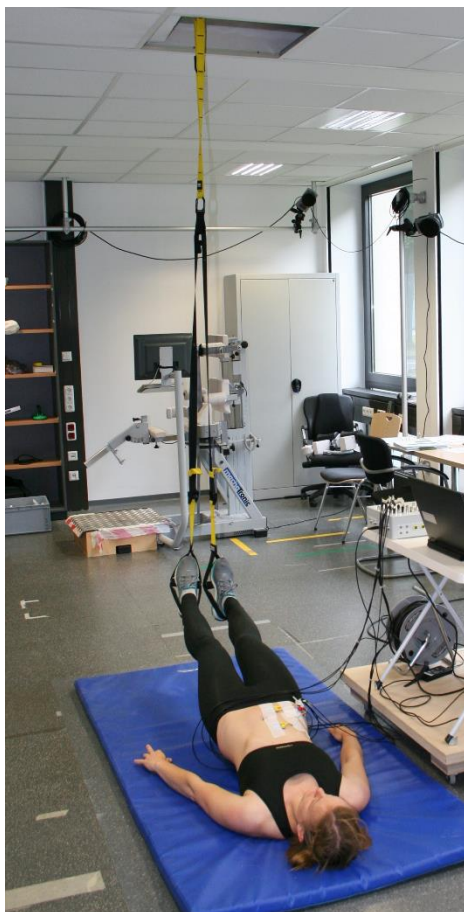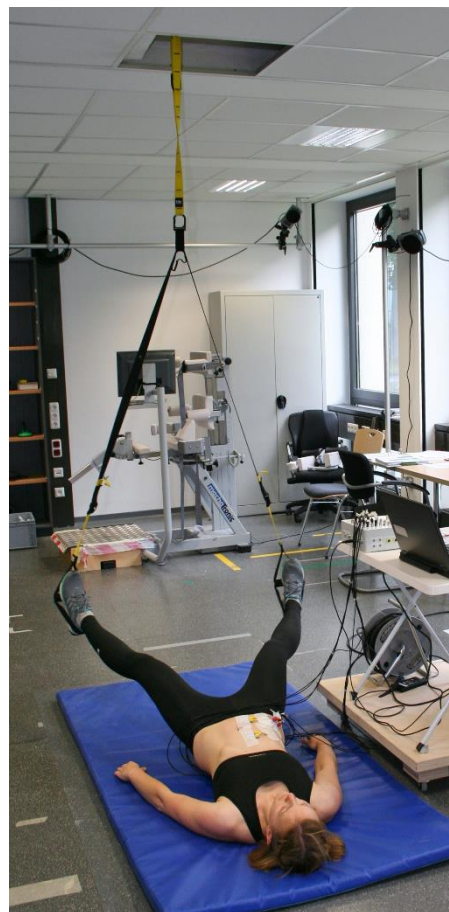

*Figure SM2.* The sling exercise „Hip abduction“. Left: starting position; right: end position.

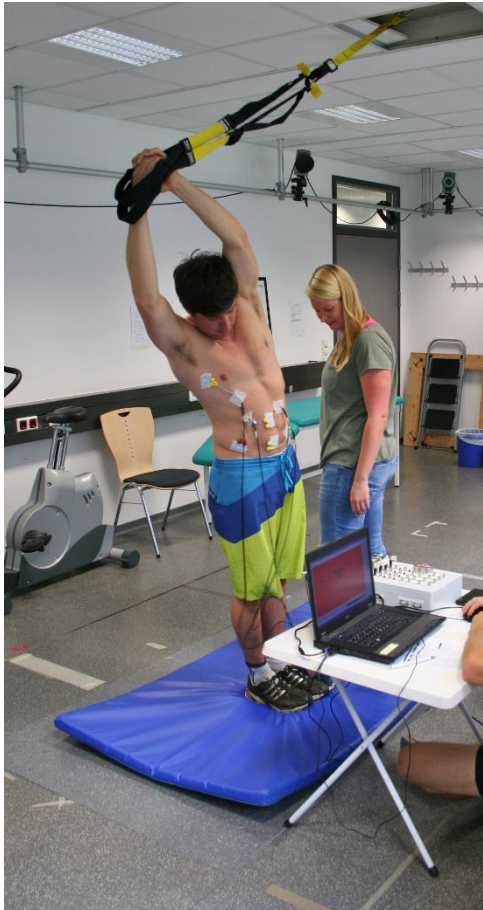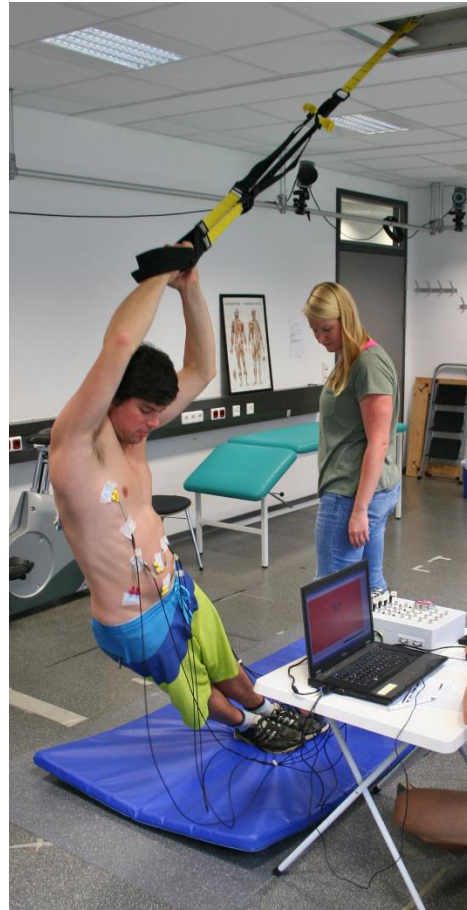

Figure SM3. The sling exercise „Hip Drop“. Left: starting position; right: end position.

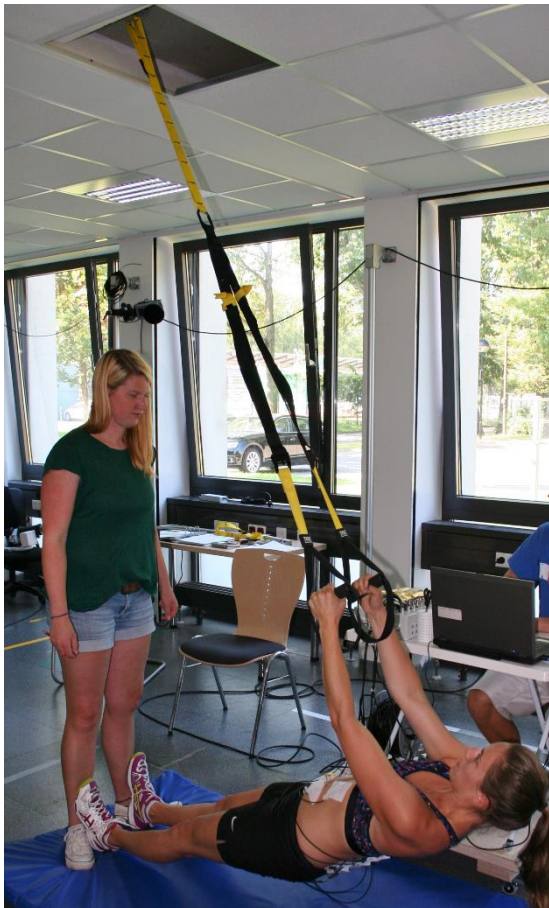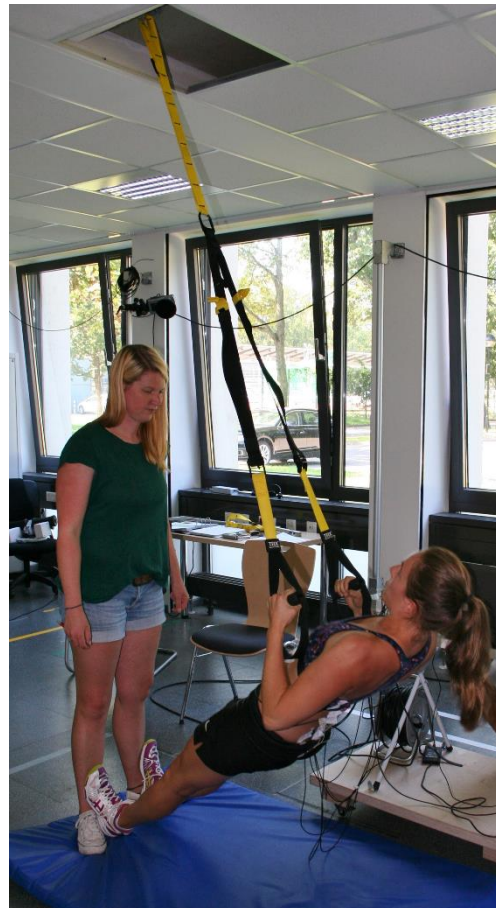

Figure SM4. The sling exercise „Rowing“. Left: starting position; right: end position.

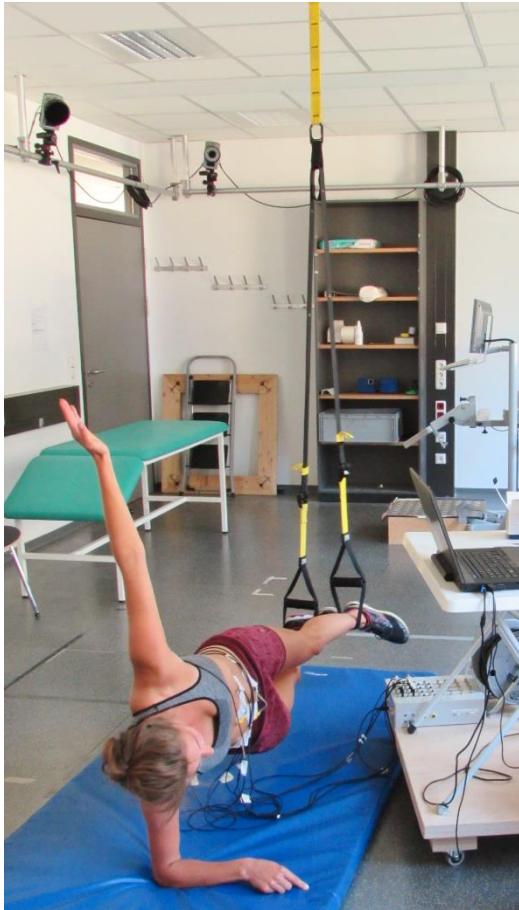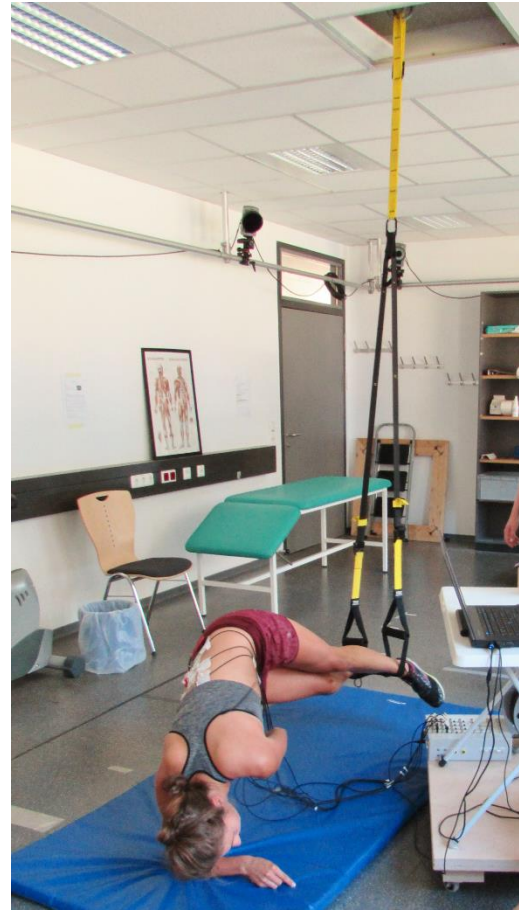

*Figure SM5.* The sling exercise „Side plank“. Left: starting position; right: end position.

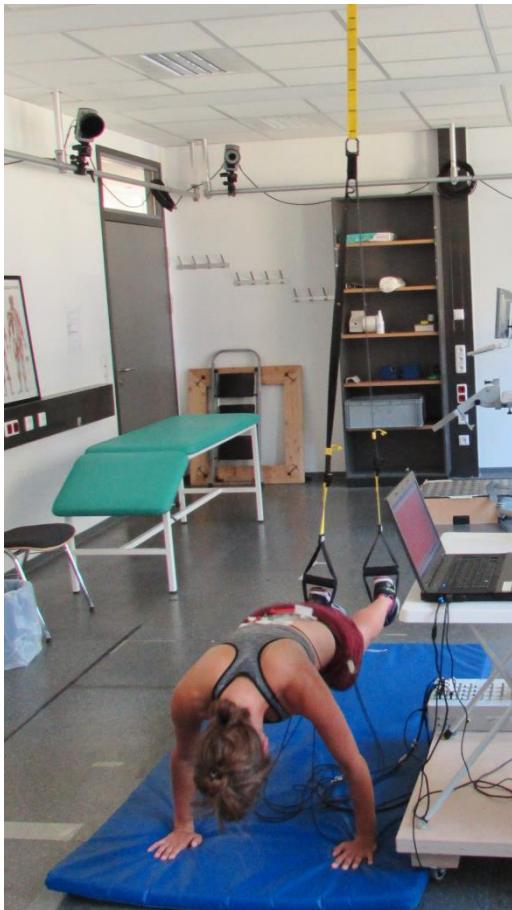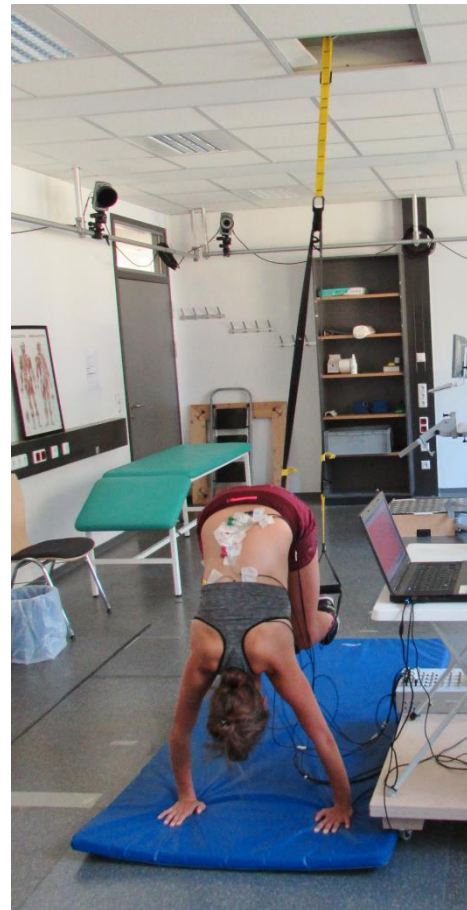

*Figure SM6.* The sling exercise „Suspended Crunch“. Left: starting position; right: end position.
